# Supplementary material for: Exploration of the truncated cytosolic Hsp70 in plants - unveiling the diverse T1 lineage and the conserved T2 lineage
Source: Front Plant Sci. 2023 Nov 16;14:1279540. doi: 10.3389/fpls.2023.1279540 (PMC10687569; doi:10.3389/fpls.2023.1279540)
Supplement: Supplementary file 2 [file Table_1.xlsx]

## Sheet: Table S1
Supplementary Table 1. Enumeration of full-length and truncated Hsp70 genes across 192 plant and green algae species. The table provides a comprehensive record of gene counts for distinct Hsp70 forms, including cyHsp70 that is divided into two lineages (T1 and T2, T1 is further divided into four subtypes, namely Type I to IV), Bips, mtHsp70s, and cpHsp70s identified within the respective cohorts …
Species	Classification		cyHsp70s								BiPs		mtHsp70s		cpHsp70s
			Full-length	Truncated							Full-length	Truncated	Full-length	Truncated	Full-length	Truncated
				T1						T2
	Clade	Family		Type I	Type II	Type III	Type IV	Unclassfied	Total
Daucus carota	Eudicots	Apiaceae	8	0	17	0	0	1	18	1	6	0	3	0	4	0
Arctium lappa	Eudicots	Asteraceae	5	0	0	2	0	1	3	0	2	0	2	0	3	0
Cynara cardunculus	Eudicots	Asteraceae	7	1	2	1	0	0	4	0	3	0	2	0	3	1
Lactuca sativa	Eudicots	Asteraceae	8	0	26	2	0	3	31	1	1	2	2	1	3	0
Helianthus annuus	Eudicots	Asteraceae	8	1	19	13	0	4	37	1	4	5	3	0	5	0
Smallanthus sonchifolius	Eudicots	Asteraceae	14	0	24	8	0	1	33	1	6	3	8	1	4	3
Cichorium intybus	Eudicots	Asteraceae	6	0	2	1	0	0	3	1	2	0	2	0	3	0
Erigeron canadensis	Eudicots	Asteraceae	8	0	11	6	0	0	17	1	2	0	3	0	3	0
Mikania micrantha	Eudicots	Asteraceae	6	3	26	9	0	1	39	1	1	5	3	0	4	0
Coffea canephora	Eudicots	Rubiaceae	6	0	3	0	0	0	3	1	6	1	2	0	2	0
Coffea eugenioides	Eudicots	Rubiaceae	6	4	0	0	0	0	4	2	7	0	2	0	2	0
Nicotiana attenuata	Eudicots	Solanaceae	9	0	1	0	0	0	1	1	5	0	2	0	2	0
Nicotiana tabacum	Eudicots	Solanaceae	13	0	1	0	0	0	1	2	11	0	3	2	4	0
Capsicum annuum	Eudicots	Solanaceae	8	0	1	0	0	0	1	1	3	0	2	0	2	0
Capsicum baccatum	Eudicots	Solanaceae	10	0	2	0	0	0	2	1	2	1	2	0	1	1
Solanum chilense	Eudicots	Solanaceae	8	0	0	0	0	0	0	1	4	0	2	0	2	0
Solanum lycopersicum	Eudicots	Solanaceae	6	0	1	0	0	0	1	1	3	1	2	0	2	0
Solanum tuberosum	Eudicots	Solanaceae	13	0	1	0	0	0	1	2	3	1	6	0	1	1
Datura stramonium	Eudicots	Solanaceae	8	0	0	0	0	0	0	1	2	0	2	1	2	1
Ipomoea nil	Eudicots	Convolvulaceae	7	0	0	0	0	0	0	2	5	0	4	0	5	0
Ipomoea triloba	Eudicots	Convolvulaceae	7	0	0	0	0	0	0	1	3	0	2	0	4	0
Cuscuta australis	Eudicots	Convolvulaceae	3	0	0	0	0	0	0	0	2	0	1	0	2	0
Cuscuta campestris	Eudicots	Convolvulaceae	8	0	10	0	0	0	10	0	4	0	2	0	4	1
Olea europaea	Eudicots	Oleaceae	12	0	0	0	0	0	0	1	6	0	5	1	4	0
Sesamum indicum	Eudicots	Pedaliaceae	6	0	0	0	0	0	0	1	5	0	2	0	3	0
Striga asiatica	Eudicots	Orobanchaceae	3	0	4	0	0	0	4	1	3	1	2	0	3	1
Striga hermonthica	Eudicots	Orobanchaceae	1	2	5	0	0	0	7	1	3	1	1	1	4	0
Lindenbergia philippensis	Eudicots	Orobanchaceae	6	0	0	0	0	1	1	1	5	0	2	0	3	0
Phtheirospermum japonicum	Eudicots	Orobanchaceae	7	2	0	0	0	0	2	1	4	0	2	0	2	1
Buddleja alternifolia	Eudicots	Scrophulariaceae	8	0	0	0	0	0	0	2	5	0	2	0	3	0
Paulownia fortunei	Eudicots	Scrophulariacea	7	1	0	0	0	0	1	2	6	0	2	0	3	0
Perilla frutescens	Eudicots	Lamiaceae	9	5	7	0	0	0	12	2	5	1	4	3	2	0
Salvia hispanica	Eudicots	Lamiaceae	8	13	11	2	0	1	27	1	3	0	2	0	4	0
Salvia splendens	Eudicots	Lamiaceae	11	4	7	2	0	0	13	2	5	0	5	0	6	0
Handroanthus impetiginosus	Eudicots	Bignoniaceae	7	0	0	0	0	0	0	1	3	0	1	0	4	0
Dorcoceras hygrometricum	Eudicots	Gesneriaceae	4	0	9	0	0	0	9	1	3	0	2	0	2	0
Erythranthe guttata	Eudicots	Phrymaceae	7	0	0	0	0	1	1	1	3	0	2	0	3	0
Catharanthus roseus	Eudicots	Apocynaceae	4	0	0	0	0	0	0	1	3	1	1	0	2	0
Camellia sinensis	Eudicots	Theaceae	7	0	0	0	0	1	1	1	2	1	2	0	3	0
Rhododendron simsii	Eudicots	Ericaceae	6	8	5	0	0	0	13	1	4	0	1	1	5	0
Impatiens glandulifera	Eudicots	Balsaminaceae	8	1	3	0	0	1	5	1	2	0	4	0	2	0
Actinidia chinensis	Eudicots	Actinidiaceae	8	0	0	0	0	0	0	1	5	0	1	0	5	0
Nyssa sinensis	Eudicots	Nyssaceae	5	3	4	0	0	0	7	2	3	0	2	1	2	1
Beta vulgaris	Eudicots	Amaranthaceae	2	0	0	0	0	0	0	1	1	0	1	0	1	0
Chenopodium quinoa	Eudicots	Amaranthaceae	12	3	18	2	0	0	23	2	4	0	3	0	4	0
Heliosperma pusillum	Eudicots	Caryophyllaceae	5	0	19	0	0	0	19	1	6	0	3	0	5	0
Spinacia oleracea	Eudicots	Amaranthaceae	4	0	3	0	0	4	7	1	2	1	3	0	2	0
Portulaca amilis	Eudicots	Portulacaceae	8	3	4	1	0	2	10	1	4	2	5	0	3	0
Vitis vinifera	Eudicots	Vitaceae	7	0	0	0	0	0	0	1	3	0	2	0	2	0
Kalanchoe fedtschenkoi	Eudicots	Crassulaceae	8	0	0	0	0	0	0	0	4	1	3	2	5	0
Eucalyptus grandis	Eudicots	Myrtaceae	2	0	0	1	0	0	1	1	3	0	2	0	2	0
Corymbia citriodora	Eudicots	Myrtaceae	5	1	0	0	0	0	1	1	3	0	2	0	2	0
Acer yangbiense	Eudicots	Sapindaceae	5	0	0	0	0	0	0	1	2	1	1	0	2	0
Citrus clementina	Eudicots	Rutaceae	6	1	0	0	0	1	2	2	5	3	3	0	2	0
Mangifera indica	Eudicots	Anacardiaceae	10	0	0	0	0	0	0	1	5	1	2	0	2	0
Pistacia vera	Eudicots	Anacardiaceae	8	1	4	0	0	1	6	1	4	0	1	0	2	0
Arabidopsis thaliana	Eudicots	Brassicaceae	5	1	0	0	0	0	1	1	3	0	3	0	2	0
Arabis alpina	Eudicots	Brassicaceae	5	0	0	0	0	0	0	1	4	0	2	0	2	0
Brassica napus	Eudicots	Brassicaceae	10	0	0	0	0	0	0	2	10	1	8	0	8	1
Brassica oleracea	Eudicots	Brassicaceae	12	0	0	0	0	0	0	1	5	0	4	0	3	0
Brassica rapa	Eudicots	Brassicaceae	10	0	0	0	0	0	0	1	4	1	4	0	5	0
Camelina sativa	Eudicots	Brassicaceae	13	0	0	0	0	0	0	3	9	1	6	0	6	0
Eutrema salsugineum	Eudicots	Brassicaceae	8	0	0	0	0	0	0	1	3	1	3	0	2	0
Carica papaya	Eudicots	Caricaceae	4	0	0	0	0	0	0	2	1	0	3	0	1	0
Tarenaya hassleriana	Eudicots	Cleomaceae	5	0	0	0	0	0	0	2	2	0	3	0	2	0
Gossypium arboreum	Eudicots	Malvaceae	3	0	0	0	0	0	0	2	4	0	1	0	1	1
Gossypium australe	Eudicots	Malvaceae	6	0	0	0	0	0	0	2	10	0	6	0	6	0
Gossypium darwinii	Eudicots	Malvaceae	6	0	1	0	0	1	2	4	6	0	2	0	2	1
Gossypium hirsutum	Eudicots	Malvaceae	9	0	0	0	0	0	0	3	3	2	1	1	3	0
Theobroma cacao matina	Eudicots	Malvaceae	10	1	0	0	0	1	2	1	9	0	7	0	5	0
Hibiscus syriacus	Eudicots	Malvaceae	6	0	0	0	0	0	0	2	6	0	3	0	3	0
Durio zibethinus	Eudicots	Malvaceae	14	0	0	0	0	0	0	1	2	0	2	0	1	0
Herrania umbratica	Eudicots	Malvaceae	11	0	0	0	0	0	0	1	4	0	2	0	1	0
Corchorus capsularis	Eudicots	Malvaceae	5	0	0	0	0	0	0	1	4	0	2	3	1	1
Shorea leprosula	Eudicots	Dipterocarpaceae	8	0	0	0	0	0	0	1	4	0	2	0	2	0
Populus trichocarpa	Eudicots	Salicaceae	16	1	1	0	0	0	2	2	4	0	2	0	1	0
Salix dunnii	Eudicots	Salicaceae	8	1	0	0	0	0	1	2	2	0	2	0	3	0
Jatropha curcas	Eudicots	Euphorbiaceae	6	0	0	0	0	0	0	1	1	1	1	0	1	0
Ricinus communis	Eudicots	Euphorbiaceae	5	0	0	0	0	0	0	1	4	0	2	0	3	0
Hevea brasiliensis	Eudicots	Euphorbiaceae	6	0	0	0	0	0	0	1	3	0	2	0	2	0
Manihot esculenta	Eudicots	Euphorbiaceae	9	0	0	0	0	0	0	1	2	0	2	0	1	0
Cephalotus follicularis	Eudicots	Cephalotaceae	8	0	0	0	0	0	0	1	4	0	3	0	2	0
Tripterygium wilfordii	Eudicots	Celastraceae	4	0	0	0	0	0	0	1	2	1	4	0	1	0
Medicago truncatula	Eudicots	Fabaceae	10	0	42	0	0	6	48	4	2	4	2	1	1	0
Pisum sativum	Eudicots	Fabaceae	8	0	14	0	0	5	19	0	1	0	2	0	2	1
Phaseolus vulgaris	Eudicots	Fabaceae	8	0	5	0	0	1	6	1	2	0	2	0	1	0
Vigna angularis	Eudicots	Fabaceae	7	0	6	0	0	1	7	2	6	0	4	0	2	1
Arachis duranensis	Eudicots	Fabaceae	6	1	14	0	0	4	19	2	4	1	2	0	1	0
Glycine max	Eudicots	Fabaceae	10	0	7	0	0	1	8	1	3	1	4	0	2	0
Lupinus angustifolius	Eudicots	Fabaceae	10	1	2	0	0	0	3	1	1	1	1	0	1	0
Ficus carica	Eudicots	Moraceae	7	0	0	0	0	0	0	1	3	1	4	0	3	0
Malus domestica golden	Eudicots	Rosaceae	5	0	0	12	0	3	15	2	2	1	2	0	1	0
Prunus dulcis	Eudicots	Rosaceae	8	0	0	4	0	0	4	1	3	2	2	0	1	0
Prunus avium	Eudicots	Rosaceae	6	0	0	16	0	1	17	1	2	0	2	0	1	0
Rosa chinensis	Eudicots	Rosaceae	5	6	8	16	0	1	31	1	2	1	2	0	1	0
Cannabis sativa	Eudicots	Cannabaceae	6	1	1	0	0	0	2	2	1	0	1	0	2	0
Cucumis melo	Eudicots	Cucurbitaceae	3	0	0	0	0	0	0	1	1	0	1	0	2	0
Cucumis sativus	Eudicots	Cucurbitaceae	4	0	0	0	0	0	0	1	1	0	1	0	2	0
Citrullus lanatus	Eudicots	Cucurbitaceae	4	0	0	0	0	0	0	1	4	2	3	0	2	2
Quercus lobata	Eudicots	Fagaceae	4	5	10	0	0	1	16	1	2	0	1	2	2	0
Quercus robur	Eudicots	Fagaceae	6	5	10	1	0	0	16	1	3	0	4	0	3	0
Quercus rubra	Eudicots	Fagaceae	1	3	8	1	0	0	12	1	1	0	4	0	5	1
Juglans regia	Eudicots	Juglandaceae	5	4	4	0	0	0	8	2	3	0	3	4	4	0
Aquilegia coerulea	Eudicots	Ranunculaceae	9	1	0	0	0	0	1	1	3	0	3	4	4	0
Aguilegia vulgars	Eudicots	Ranunculaceae	8	1	0	0	0	0	1	1	6	0	6	0	8	2
Zingiber officinale	Monocots	Zingiberaceae	8	2	4	0	0	0	6	2	3	0	3	1	3	0
Musa acuminata	Monocots	Musaceae	13	1	1	0	0	0	2	3	3	2	4	0	2	1
Musa balbisiana	Monocots	Musaceae	8	0	0	0	0	0	0	1	8	3	3	3	2	1
Musa troglodytarum	Monocots	Musaceae	7	0	1	0	0	0	1	2	1	1	3	1	3	0
Ensete ventricosum	Monocots	Musaceae	8	0	1	0	0	0	1	1	2	4	3	0	4	0
Zea mays	Monocots	Poaceae	6	0	1	0	0	1	2	1	5	0	2	2	2	0
Oryza sativa	Monocots	Poaceae	7	0	3	0	0	0	3	1	7	1	9	1	6	0
Triticum aestivum	Monocots	Poaceae	24	2	11	3	0	7	23	2	15	6	9	1	6	0
Triticum turgidum	Monocots	Poaceae	3	3	5	2	0	6	16	2	8	1	3	2	1	2
Aegilops tauschii	Monocots	Poaceae	7	0	1	1	0	1	3	1	4	1	2	1	1	1
Hordeum vulgare	Monocots	Poaceae	5	0	4	0	0	3	7	1	7	2	3	3	2	0
Secale cereale	Monocots	Poaceae	7	0	4	0	0	2	6	1	3	2	3	0	2	0
Setaria italica	Monocots	Poaceae	11	0	0	1	0	1	2	1	6	2	3	0	2	0
Setaria viridis	Monocots	Poaceae	6	0	1	1	0	1	3	1	3	2	2	0	2	0
Sorghum bicolor	Monocots	Poaceae	6	0	6	1	0	0	7	1	3	4	3	1	1	1
Aegilops tauschii	Monocots	Poaceae	6	0	1	1	0	1	3	1	5	0	4	0	2	0
Brachypodium distachyon	Monocots	Poaceae	7	0	4	0	0	1	5	1	3	2	2	1	3	0
Eragrostis curvula	Monocots	Poaceae	6	0	5	1	0	0	6	1	5	1	3	0	2	0
Leersia perrieri	Monocots	Poaceae	1	1	3	0	0	0	4	1	3	0	3	0	2	0
Panicum hallii fil2	Monocots	Poaceae	5	0	2	3	0	0	5	1	2	1	3	1	1	1
Saccharum spontaneum	Monocots	Poaceae	6	2	1	1	0	0	4	2	3	1	7	0	6	0
Bonia amplexicaulis	Monocots	Poaceae	2	0	0	0	0	0	0	1	2	0	4	1	3	0
Guadua angustifolia	Monocots	Poaceae	9	0	3	1	0	1	5	0	2	5	3	0	2	0
Olyra latifolia	Monocots	Poaceae	7	0	0	0	0	0	0	1	2	1	3	2	3	3
Raddia guianensis	Monocots	Poaceae	6	0	1	0	0	0	1	1	3	3	3	0	2	0
Pharus latifolius	Monocots	Poaceae	5	0	0	0	0	0	0	1	5	0	4	0	2	0
Ananas comosus	Monocots	Bromeliaceae	8	0	0	0	0	0	0	1	1	1	3	0	2	0
Phoenix dactylifera	Monocots	Arecaceae	4	0	0	0	0	0	0	1	3	1	5	0	3	0
Elaeis guineensis	Monocots	Arecaceae	9	0	0	0	0	1	1	1	1	0	2	0	2	0
Apostasia shenzhenica	Monocots	Orchidaceae	9	0	0	0	0	0	0	1	2	1	2	0	2	0
Dendrobium nobile	Monocots	Orchidaceae	1	0	0	0	0	0	0	1	4	0	3	2	1	1
Vanilla planifolia	Monocots	Orchidaceae	5	1	0	0	0	0	1	1	1	0	2	0	2	1
Phalaenopsis equestris	Monocots	Orchidaceae	4	0	0	0	0	0	0	2	3	1	1	1	2	1
Asparagus officinalis	Monocots	Asparagaceae	3	0	2	0	0	0	2	1	4	0	3	0	2	0
Dioscorea alata	Monocots	Dioscoreaceae	2	1	2	0	0	0	3	1	4	0	3	0	2	0
Zostera marina	Monocots	Zosteraceae	6	4	2	0	0	1	7	0	3	0	2	0	3	0
Spirodela intermedia	Monocots	Araceae	6	0	0	0	0	0	0	1	3	0	3	0	2	0
Acorus americanus	Monocots	Acoraceae	6	1	1	0	0	0	2	1	4	0	5	2	3	1
Litsea cubeba	Magnoliids	Lauraceae	7	3	11	2	15	8	39	3	2	0	4	0	3	0
Cinnamomum micranthum	Magnoliids	Lauraceae	6	2	5	0	20	12	39	2	2	0	4	1	2	0
Persea americana	Magnoliids	Lauraceae	6	9	29	0	13	4	55	3	1	1	2	1	2	0
Chimonanthus nitens	Magnoliids	Calycanthaceae	7	5	8	0	6	1	20	1	2	0	3	0	2	0
Liriodendron chinense	Magnoliids	Magnoliaceae	7	5	0	0	0	2	7	1	2	0	2	0	2	0
Magnolia officinalis	Magnoliids	Magnoliaceae	6	0	0	0	0	1	1	2	2	0	2	0	2	0
Aristolochia fimbriata	Magnoliids	Aristolochiaceae	5	2	0	0	0	0	2	1	2	0	1	0	2	1
Aristolochia contorta	Magnoliids	Aristolochiaceae	5	0	0	0	0	0	0	1	2	0	1	0	2	0
Chloranthus spicatus	Chloranthales	Chloranthaceae	9	9	9	0	0	4	22	1	3	2	3	3	1	1
Nymphaea colorata	Basal angiosperms	Nymphaeaceae	2	0	5	0	0	0	5	1	1	1	3	1	1	0
Nymphaea thermarum	Basal angiosperms	Nymphaeaceae	4	1	3	1	0	0	5	1	2	0	2	0	1	0
Amborella trichopoda	Basal angiosperms	Amborellaceae	4	0	0	0	0	0	0	1	2	1	2	0	1	0
Pinus sylvestris	Gymnosperms	Pinaceae	2	0	2	1	0	0	3	0	2	0	3	0	1	0
Pinus pinaster	Gymnosperms	Pinaceae	9	3	0	0	0	0	3	2	1	0	4	0	1	0
Pinus taeda	Gymnosperms	Pinaceae	4	0	21	0	0	2	23	1	1	4	1	0	1	0
Picea abies	Gymnosperms	Pinaceae	6	1	3	0	0	2	6	0	2	2	3	1	2	0
Picea glauca	Gymnosperms	Pinaceae	5	0	2	0	0	1	3	0	3	0	3	2	1	0
Picea sitchensis	Gymnosperms	Pinaceae	3	1	0	0	0	0	1	0	2	1	1	0	1	0
Taxus baccata	Gymnosperms	Taxaceae	1	0	1	0	0	0	1	1	3	0	3	0	1	0
Thuja plicata	Gymnosperms	Cupressaceae	2	0	24	0	0	4	28	1	2	0	3	0	1	0
Ceratopteris richardii	Ferns	Pteridaceae	4	0	1	0	0	0	1	1	2	0	3	1	3	0
Salvinia cucullata	Ferns	Salviniaceae	5	0	1	0	0	0	1	1	2	0	1	0	2	2
Selaginella moellendorffii	Lycophytes	Selaginellaceae	7	0	0	0	0	0	0	2	4	2	2	0	4	0
Physcomitrella patens	Mosses	Funariaceae	3	0	0	0	0	0	0	0	2	0	4	0	5	0
Sphagnum fallax	Mosses	Sphagnaceae	2	0	0	0	0	0	0	0	2	0	3	0	4	0
Marchantia polymorpha	Liverworts	Marchantiaceae	8	0	2	0	0	0	2	0	1	0	1	0	2	0
Marchantia paleacea	Liverworts	Marchantiaceae	6	0	0	1	0	0	1	0	1	1	1	0	2	0
Anthoceros agrestis	Hornworts	Anthocerotaceae	2	0	0	0	0	0	0	3	1	0	1	0	2	0
Anthoceros punctatus	Hornworts	Anthocerotaceae	2	0	0	0	0	0	0	3	1	0	1	0	2	0
Klebsormidium nitens	Charophytes	Klebsormidiaceae	1	0	0	0	0	1	1	0	1	0	1	0	2	0
Chlorokybus atmophyticus	Charophytes	Chlorokybaceae	2	0	0	0	0	0	0	0	1	0	1	0	1	0
Chlamydomonas reinhardtii	Charophytes	Chlamydomonadaceae	1	0	0	0	0	0	0	0	2	0	1	0	1	0
Volvox carteri	Chlorophytes	Volvocaceae	2	0	0	0	0	0	0	0	1	0	1	0	1	0
Tetrabaena socialis	Chlorophytes	Tetrabaenaceae	1	2	0	0	0	0	2	0	1	1	0	0	1	0
Astrephomene gubernaculifera	Chlorophytes	Astrephomenaceae	1	0	1	0	0	0	1	0	1	0	1	0	1	0
Edaphochlamys debaryana	Chlorophytes	Chlamydomonadales incertae sedis	1	0	0	0	0	0	0	0	3	0	2	0	1	0
Dunaliella salina	Chlorophytes	Dunaliellaceae	1	0	0	0	0	0	0	0	1	0	0	1	1	0
Coccomyxa subellipsoidea C-169	Chlorophytes	Coccomyxaceae	2	0	0	0	0	0	0	0	1	0	1	0	1	0
Auxenochlorella protothecoides	Chlorophytes	Chlorellaceae	0	0	0	0	0	0	0	0	1	0	1	0	1	0
Chlorella variabilis	Chlorophytes	Chlorellaceae	2	0	0	0	0	1	1	0	0	0	1	0	1	0
Helicosporidium sp. ATCC 50920	Chlorellales	Chlorellaceae	0	0	1	0	0	0	1	0	1	0	1	0	0	1
Micractinium conductrix	Chlorophytes	Chlorellaceae	1	0	2	0	0	1	3	0	0	1	1	0	1	0
Gonium pectorale	Chlorophytes	Volvocaceae	1	0	0	0	0	0	0	0	1	0	1	0	1	0
Monoraphidium neglectum	Chlorophytes	Chlorophyceae	1	0	0	0	0	0	0	0	0	0	0	0	1	0
Bathycoccus prasinos	Chlorophytes	Bathycoccaceae	1	0	1	0	0	0	1	0	0	0	1	0	1	0
Ostreococcus lucimarinus	Chlorophytes	Bathycoccaceae	1	0	1	0	0	0	1	0	1	0	1	0	1	0
Ostreococcus tauri	Chlorophytes	Bathycoccaceae	1	0	1	0	0	0	1	0	1	0	1	0	0	1
Raphidocelis subcapitata	Chlorophytes	Selenastraceae	0	0	0	0	0	0	0	0	1	0	0	1	1	0
Haematococcus lacustris	Chlorophytes	Haematococcaceae	1	0	0	0	0	0	0	0	1	1	0	0	3	1
