# Supplementary material for: Exploration of the truncated cytosolic Hsp70 in plants - unveiling the diverse T1 lineage and the conserved T2 lineage
Source: Front Plant Sci. 2023 Nov 16;14:1279540. doi: 10.3389/fpls.2023.1279540 (PMC10687569; doi:10.3389/fpls.2023.1279540)
Supplement: Supplementary file 3 [file Table_2.xlsx]

## Sheet: Table S2
Supplementary Table 2. The number of T1 gene clusters in T1-rich plant species. The table provides a comprehensive overview of T1 gene clusters, their corresponding gene quantities for each cluster, as well as the quantities of T1 genes at individual genomic positions across 26 T1-rich plant species. These T1-rich plant species are characterized by their possession of 15 or more T1 genes. A T1 ge…
Spesies	Clade	Family	Number of T1 gene	Number of T1 gene clusters	The number of T1 genes at each genomic position
Daucus carota	Eudicots	Apiaceae	18	2	3, 3, 2, 2, 2, 1, 1, 1, 1, 1, 1
Erigeron canadensis	Eudicots	Asteraceae	17	2	4, 4, 2, 1, 1, 1, 1, 1, 1, 1
Lactuca sativa	Eudicots	Asteraceae	31	3	10, 8, 4, 2, 1, 1, 1, 1, 1, 1, 1
Smallanthus sonchifolius	Eudicots	Asteraceae	33	4	6, 6, 4, 4, 2, 2, 2, 2, 1, 1, 1, 1, 1
Helianthus annuus	Eudicots	Asteraceae	37	4	6, 6, 3, 3, 2, 2, 2, 2, 1, 1, 1, 1, 1, 1, 1, 1, 1, 1, 1
Mikania micrantha	Eudicots	Asteraceae	39	5	11, 6, 5, 4, 3, 2, 2, 2, 1, 1, 1, 1
Salvia hispanica	Eudicots	Lamiaceae	27	1	17, 2, 2, 2, 1, 1, 1, 1
Chenopodium quinoa	Eudicots	Amaranthaceae	23	2	11, 3, 2, 2, 1, 1, 1, 1, 1
Heliosperma pusillum	Eudicots	Caryophyllaceae	19	2	6, 5, 2, 2, 1, 1, 1, 1
Pisum sativum	Eudicots	Fabaceae	19	2	10, 4, 1, 1, 1, 1, 1
Medicago truncatula	Eudicots	Fabaceae	48	3	15, 6, 3, 2, 2, 2, 1, 1, 1, 1, 1, 1, 1, 1, 1, 1, 1, 1, 1, 1, 1, 1, 1, 1
Arachis duranensis	Eudicots	Fabaceae	19	2	13, 3, 1, 1, 1
Malus domestica golden	Eudicots	Rosaceae	15	2	9, 3, 2, 1
Prunus avium	Eudicots	Rosaceae	17	2	6, 4, 1, 1, 1, 1, 1, 1, 1
Rosa chinensis	Eudicots	Rosaceae	31	5	11, 4, 3, 3, 3, 2, 1, 1, 1, 1, 1
Quercus lobata	Eudicots	Fagaceae	16	3	5, 4, 3, 1, 1, 1, 1
Quercus robur	Eudicots	Fagaceae	16	1	8, 2, 1, 1, 1, 1, 1, 1
Triticum aestivum	Monocots	Poaceae	23	3	4, 3, 3, 2, 2, 1, 1, 1, 1, 1, 1, 1, 1, 1
Triticum turgidum	Monocots	Poaceae	16	0	1, 1, 1, 1, 1, 1, 1, 1, 1, 1, 1, 1, 1, 1, 1, 1
Cinnamomum micranthum	Magnoliids	Lauraceae	39	4	20 (11, 5, 4), 9, 4, 3, 2, 1
Litsea cubeba	Magnoliids	Lauraceae	39	3	24 (12, 7, 5), 9, 4, 2
Persea americana	Magnoliids	Lauraceae	55	7	9, 6, 6, 4, 4, 3, 3, 2, 2, 2, 2, 2, 1, 1, 1, 1, 1, 1, 1, 1, 1, 1
Chimonanthus nitens	Magnoliids	Calycanthaceae	20	2	10, 9, 1
Chloranthus spicatus	Chloranthales	Chloranthaceae	22	1	18, 2, 1,1
Pinus taeda	Gymnosperm	Pinaceae	23	0	1, 1, 1, 1, 1, 1, 1, 1, 1, 1, 1, 1, 1, 1, 1, 1, 1, 1, 1, 1, 1, 1, 1
Thuja plicata	Gymnosperm	Cupressaceae	28	1	5, 2, 1, 1, 1, 1, 1, 1, 1, 1, 1, 1, 1, 1, 1, 1, 1, 1, 1, 1, 1, 1, 1
