# Supplementary material for: Exploration of the truncated cytosolic Hsp70 in plants - unveiling the diverse T1 lineage and the conserved T2 lineage
Source: Front Plant Sci. 2023 Nov 16;14:1279540. doi: 10.3389/fpls.2023.1279540 (PMC10687569; doi:10.3389/fpls.2023.1279540)
Supplement: Supplementary file 4 [file Table_3.xlsx]

## Sheet: Table_S3
Supplementary Table 3. Accession numbers and databases of the sequenced plant and green algae genomes utilized in the study.
Species	Accession number	Database
Daucus carota	GCA_001625215.1	Ensembl Plants
Arctium lappa	GCA_023525745.1	NCBI
Cynara cardunculus	GCA_001531365.2	Ensembl Plants
Lactuca sativa	GCA_002870075.3	Ensembl Plants
Helianthus annuus	GCA_002127325.2	Ensembl Plants
Smallanthus sonchifolius	GCA_023525975.1	NCBI
Cichorium intybus	GCA_023525715.1	NCBI
Erigeron canadensis	GCA_010389155.1	NCBI
Mikania micrantha	GCA_009363875.1	NCBI
Coffea canephora	GCA_900059795.1	Ensembl Plants
Coffea eugenioides	GCA_003713205.1	NCBI
Nicotiana attenuata	GCA_001879085.1	Ensembl Plants
Nicotiana tabacum	GCA_000715135.1	NCBI
Capsicum annuum	GCA_002878395.3	Ensembl Plants
Capsicum baccatum	GCA_002271885.2	NCBI
Solanum chilense	GCA_027704845.1	NCBI
Solanum lycopersicum	GCA_000188115.3	Ensembl Plants
Solanum tuberosum	GCA_000226075.1	NCBI
Datura stramonium	GCA_018107945.1	NCBI
Ipomoea nil	GCA_001879475.1	NCBI
Ipomoea triloba	GCA_003576645.1	Ensembl Plants
Cuscuta australis	GCA_003260385.1	NCBI
Cuscuta campestris	GCA_900332095.2	NCBI
Olea europaea	GCA_902713445.1	Ensembl Plants
Sesamum indicum	GCA_000512975.1	NCBI
Striga asiatica	GCA_008636005.1	NCBI
Striga hermonthica	GCA_902706635.1	NCBI
Lindenbergia philippensis	JGIAP: 1297368	Phytozome
Phtheirospermum japonicum	GCA_014905375.1	NCBI
Buddleja alternifolia	GCA_019426215.1	NCBI
Paulownia fortunei	GCA_019321725.1	NCBI
Perilla frutescens	GCA_019511825.2	NCBI
Salvia hispanica	GCA_023119035.1	NCBI
Salvia splendens	GCA_004379255.2	NCBI
Handroanthus impetiginosus	GCA_002762385.1	NCBI
Dorcoceras hygrometricum	GCA_001598015.1	NCBI
Erythranthe guttata	GCA_000504015.1	NCBI
Catharanthus roseus	GCA_024505715.1	NCBI
Camellia sinensis	GCA_004153795.1	NCBI
Rhododendron simsii	GCA_014282245.1	NCBI
Impatiens glandulifera	GCA_907164915.1	NCBI
Actinidia chinensis	GCA_003024255.1	Ensembl Plants
Actinidia rufa	GCA_014362265.1	NCBI
Vaccinium darrowii	GCA_020921065.1	Phytozome
Nyssa sinensis	GCA_008638375.1	NCBI
Beta vulgaris	GCA_000511025.2	Ensembl Plants
Chenopodium quinoa	GCA_001683475.1	Ensembl Plants
Heliosperma pusillum	GCA_022085475.1	NCBI
Spinacia oleracea	GCA_002007265.1	NCBI
Portulaca amilis	Phytozome genome ID: 692	Phytozome
Vitis vinifera	GCA_000003745.2	Ensembl Plants
Kalanchoe fedtschenkoi	GCA_002312845.1	Ensembl Plants
Eucalyptus grandis	GCA_016545825.1	Ensembl Plants
Corymbia citriodora	GCA_014858505.1	Ensembl Plants
Acer yangbiense	GCA_008009225.1	NCBI
Citrus clementina	GCA_002897195.1	Ensembl Plants
Mangifera indica	GCA_011075055.1	NCBI
Pistacia vera	GCA_008641045.1	Ensembl Plants
Arabidopsis thaliana	GCA_000001735.2	TAIR
Arabis alpina	GCA_900128785.1	Ensembl Plants
Brassica rapa	GCA_000309985.3	Ensembl Plants
Camelina sativa	GCA_000633955.1	Ensembl Plants
Eutrema salsugineum	GCA_000478725.1	Ensembl Plants
Carica papaya	GCA_000150535.1	NCBI
Tarenaya hassleriana	GCA_000463585.1	NCBI
Gossypium arboreum	GCA_025698485.2	NCBI
Gossypium australe	GCA_005393395.2	NCBI
Gossypium darwinii	GCA_007990325.1	NCBI
Gossypium hirsutum	GCA_007990345.1	NCBI
Theobroma cacao matina	GCA_000403535.1	Ensembl Plants
Hibiscus syriacus	GCA_006381635.2	NCBI
Durio zibethinus	GCA_002303985.1	NCBI
Herrania umbratica	GCA_002168275.2	NCBI
Corchorus capsularis	GCA_001974805.1	NCBI
Shorea leprosula	GCA_020521535.1	NCBI
Populus trichocarpa	GCA_000002775.3	Ensembl Plants
Salix dunnii	GCA_015731905.1	NCBI
Jatropha curcas	GCA_014843425.1	NCBI
Ricinus communis	GCA_019578655.1	NCBI
Hevea brasiliensis	GCA_001654055.1	NCBI
Manihot esculenta	GCA_001659605.2	NCBI
Cephalotus follicularis	GCA_001972305.1	NCBI
Tripterygium wilfordii	GCA_013401445.1	NCBI
Medicago truncatula	GCA_003473485.2	Ensembl Plants
Pisum sativum	GCA_024323335.1	Ensembl Plants
Phaseolus vulgaris	GCA_000499845.1	Ensembl Plants
Vigna angularis	GCA_001190045.1	Ensembl Plants
Arachis hypogaea	GCA_003086295.2	NCBI
Glycine max	GCA_000004515.5	Ensembl Plants
Lupinus angustifolius	GCA_001865875.1	Ensembl Plants
Ficus carica	GCA_009761775.1	Ensembl Plants
Malus domestica golden	GCA_002114115.1	Ensembl Plants
Prunus dulcis	GCA_902201215.1	Ensembl Plants
Prunus avium	GCA_002207925.1	Ensembl Plants
Rosa chinensis	GCA_002994745.2	Ensembl Plants
Cannabis sativa	GCA_900626175.1	Ensembl Plants
Cucumis melo	GCA_000313045.1	Ensembl Plants
Cucumis sativus	GCA_000004075.3	Ensembl Plants
Citrullus lanatus	GCA_018142915.1	Ensembl Plants
Quercus lobata	GCA_001633185.2	Ensembl Plants
Quercus robur	GCA_932294415.1	NCBI
Quercus rubra	Phytozome genome ID: 687	Phytozome
Juglans regia	GCA_001411555.2	Ensembl Plants
Aquilegia coerulea	GCA_002738505.1	Phytozome
Aquilegia vulgaris	PRJNA931641	NCBI
Zingiber officinale	GCA_011317585.1	NCBI
Musa acuminata	GCA_000313855.2	Ensembl Plants
Musa balbisiana	GCA_004837865.1	NCBI
Musa troglodytarum	GCA_023547065.1	NCBI
Ensete ventricosum	GCA_000818735.3	NCBI
Zea mays	GCA_902167145.1	Ensembl Plants
Oryza sativa	GCA_001433935.1	Ensembl Plants
Triticum aestivum	GCA_018294505.1	Ensembl Plants
Triticum turgidum	GCA_900231445.1	Ensembl Plants
Aegilops tauschii	GCA_002575655.2	Ensembl Plants
Hordeum vulgare	GCA_904849725.1	Ensembl Plants
Secale cereale	GCA_016097815.1	Ensembl Plants
Setaria italica	GCA_000263155.2	Ensembl Plants
Setaria viridis	GCA_005286985.1	Ensembl Plants
Sorghum bicolor	GCA_000003195.3	Ensembl Plants
Aegilops tauschii	GCA_002575655.2	Ensembl Plants
Brachypodium distachyon	GCA_000005505.4	NCBI
Eragrostis curvula	GCA_007726485.1	NCBI
Leersia perrieri	GCA_000325765.3	Ensembl Plants
Panicum hallii fil2	GCA_002211085.2	Ensembl Plants
Saccharum spontaneum	GCA_022457205.1	Ensembl Plants
Bonia amplexicaulis	PRJNA432605, PRJNA417139	Bamboo genome database
Guadua angustifolia	PRJNA316279	Bamboo genome database
Olyra latifolia	PRJNA248874	Bamboo genome database
Raddia guianensis	PRJEB60482	Bamboo genome database
Pharus latifolius	GCA_019359835.1	Phytozome
Ananas comosus	GCA_001540865.1	Ensembl Plants
Phoenix dactylifera	GCA_009389715.1	NCBI
Elaeis guineensis	GCA_000442705.1	NCBI
Apostasia shenzhenica	GCA_002786265.1	NCBI
Dendrobium nobile	GCA_022539455.1	NCBI
Vanilla planifolia	GCA_023846275.1	NCBI
Phalaenopsis equestris	GCA_001263595.1	NCBI
Asparagus officinalis	GCA_001876935.1	Ensembl Plants
Dioscorea alata	GCA_020875875.1	NCBI
Zostera marina	GCA_001185155.1	Phytozome
Spirodela intermedia	GCA_902729315.2	NCBI
Acorus americanus	JGIAP: 1337857	Phytozome
Litsea cubeba	GCA_012931725.1	NCBI
Cinnamomum micranthum	GCA_003546025.1	NCBI
Persea americana	GCA_029852735.1	NCBI
Chimonanthus nitens	PRJNA550849	NCBI
Liriodendron chinense	GCA_003013855.2	NCBI
Magnolia officinalis	GCA_021015155.1	NCBI
Aristolochia fimbriata	GCA_019845555.1	NCBI
Aristolochia contorta	GCA_022405105.1	NCBI
Chloranthus spicatus	PRJCA006994	NGDC
Nymphaea colorata	GCA_008831285.2	Ensembl Plants
Nymphaea thermarum	GCA_011799765.1	NCBI
Amborella trichopoda	GCA_000471905.1	Ensembl Plants
Pinus sylvestris	GCA_900143225.1	PLAZA
Pinus pinaster	PRJNA707426	PLAZA
Pinus taeda	GCA_000404065.3	PLAZA
Picea abies	GCA_900067695.1	PLAZA
Picea glauca	GCA_000966675.3	PLAZA
Picea sitchensis	GCA_010110895.2	PLAZA
Taxus baccata	PRJNA791291	PLAZA
Thuja plicata	GCA_018584345.1	Phytozome
Ceratopteris richardii	GCA_020310875.1	NCBI
Salvinia cucullata	PRJNA430459	FernBase
Selaginella moellendorffii	GCA_000143415.2	Ensembl Plants
Physcomitrella patens	GCA_000002425.2	Phytozome
Sphagnum fallax	GCA_021442195.1	Phytozome
Marchantia polymorpha	GCA_003032435.1	Phytozome
Marchantia paleacea	GCA_014180765.2	NCBI
Anthoceros agrestis	PRJNA642533	University of Zurich
Anthoceros punctatus	PRJNA574424	University of Zurich
Klebsormidium nitens	GCA_000708835.1	NCBI
Chlorokybus atmophyticus	GCA_009103225.1	NCBI
Chlamydomonas reinhardtii	GCA_000002595.3	NCBI
Volvox carteri	GCA_000143455.1	Phytozome
Tetrabaena socialis	GCA_002891735.1	NCBI
Astrephomene gubernaculifera	GCA_021605115.1	NCBI
Edaphochlamys debaryana	GCA_016858145.1	NCBI
Dunaliella salina	GCA_002284615.2	NCBI
Coccomyxa subellipsoidea	GCA_000258705.1	Phytozome
Auxenochlorella protothecoides	GCA_000733215.1	NCBI
Chlorella variabilis	GCA_000147415.1	NCBI
Helicosporidium sp. ATCC 50920	GCA_000690575.1	NCBI
Micractinium conductrix	GCA_002245815.2	NCBI
Gonium pectorale	GCA_001584585.1	NCBI
Monoraphidium neglectum	GCA_000611645.1	NCBI
Bathycoccus prasinos	GCA_002220235.1	NCBI
Ostreococcus lucimarinus	GCA_000092065.1	NCBI
Ostreococcus tauri	GCA_905339545.1	NCBI
Raphidocelis subcapitata	GCA_003203535.1	NCBI
Haematococcus lacustris	GCA_003970955.1	NCBI
