# Supplementary material for: Exploration of the truncated cytosolic Hsp70 in plants - unveiling the diverse T1 lineage and the conserved T2 lineage
Source: Front Plant Sci. 2023 Nov 16;14:1279540. doi: 10.3389/fpls.2023.1279540 (PMC10687569; doi:10.3389/fpls.2023.1279540)
Supplement: Supplementary file 5 [file Table_4.xlsx]

## Sheet: Sheet1
Supplementary Table 4. The accession number of RNA-seq database used for transcript level analysis. All database were download from the SRA database of NCBI.
Organism	Treatment		Tissue type	Time	Accession no.
Arabidopsis thaliana	heat 38°C		seedling	0 min	SRR22823336
					SRR22823337
				15 mins	SRR22823332
					SRR22823333
				60 mins	SRR22823330
					SRR22823331
	drought		shoot	0 day	SRR22397266
					SRR22397265
				1 day	SRR22397141
					SRR22397140
					SRR22397139
				2 days	SRR22397134
					SRR22397133
					SRR22397132
				3 days	SRR22397128
					SRR22397207
					SRR22397206
			root	0 day	SRR22397162
					SRR22397161
				1 day	SRR22397250
					SRR22397249
					SRR22397248
				2 days	SRR22397244
					SRR22397243
					SRR22397241
				3 days	SRR22397237
					SRR22397236
					SRR22397235
	cold 4°C		seedling	0 hr	DRR228480
					DRR228468
					DRR228492
				3 hours	DRR228469
					DRR228481
					DRR228493
				12 hours	DRR228470
					DRR228482
					DRR228494
	none		seedling		SRR3581345
					SRR3581833
					SRR3581336
					SRR3581740
					SRR3581346
					SRR3581831
					SRR3581347
					SRR3581834
			Leaf		SRR3581681
					SRR3581847
					SRR3581591
					SRR3581676
					SRR3581840
					SRR3581843
					SRR3581680
					SRR3581846
					SRR3581388
					SRR3581838
					SRR3581499
					SRR3581639
					SRR3581839
					SRR3581841
					SRR3581678
					SRR3581844
					SRR3581682
					SRR3581848
					SRR3581383
					SRR3581837
					SRR3581672
					SRR3581842
					SRR3581679
					SRR3581845
					SRR3581683
					SRR3581849
			Root		SRR3581356
					SRR3581836
					SRR3581352
					SRR3581835
			Flower		SRR3581693
					SRR3581859
					SRR3581694
					SRR3581860
					SRR3581695
					SRR3581861
					SRR3581696
					SRR3581862
					SRR3581697
					SRR3581863
					SRR3581700
					SRR3581866
					SRR3581701
					SRR3581867
					SRR3581702
					SRR3581868
					SRR3581698
					SRR3581864
					SRR3581699
					SRR3581865
			3 DAP seed		SRR3581709
					SRR3581875
			7 DAP seed		SRR3581715
					SRR3581881
			Dry seed		SRR3581731
					SRR3581892
Helianthus annuus	heat 39°C		Leaves	0 hour	SRR21049886
					SRR21049885
					SRR21049884
				4 hours	SRR21049883
					SRR21049882
					SRR21049881
				8 hours	SRR21049880
					SRR21049879
					SRR21049877
				16 hours	SRR21049876
					SRR21049875
					SRR21049874
				32 hours	SRR21049873
					SRR21049872
					SRR21049871
	drought	ND, 75 ± 5% water content	Leaves	5 days	SRR21049890
					SRR21049889
					SRR21049878
		MD, 40 ± 5% water content			SRR21049867
					SRR21049856
					SRR21049845
		SD, 20 ± 5% water content			SRR21049837
					SRR21049836
					SRR21049835
		WD, 3 days SD + 2 days ND			SRR21049834
					SRR21049888
					SRR21049887
	cold 4°C		Leaves	0 hour	SRR21049850
					SRR21049849
					SRR21049848
				8 hours	SRR21049847
					SRR21049846
					SRR21049844
				16 hours	SRR21049843
					SRR21049842
					SRR21049841
				32 hours	SRR21049840
					SRR21049839
					SRR21049838
	none		Leaf		SRR7691055
			Ligule		SRR7691054
			Root		SRR7691056
			Pistil		SRR7691052
			Stamen		SRR7691053
			Seed		SRR7691057
Arachis hypogaea	none		Seedling		SRR13452197
					SRR13452198
			Leaf		SRR13452201
					SRR13452209
			Root		SRR13452208
			Floewr		SRR13452195
			5 DAP		SRR13452194
			15 DAP		SRR13452193
			25 DAP		SRR13452205
			Seed		SRR13452210
Litsea cubeba	none		Leaf		SRR10064024
					SRR10064023
					SRR10064022
			Root		SRR10064031
					SRR10064030
					SRR10064029
			Flower		SRR10064021
			Stem		SRR10064028
					SRR10064027
					SRR10064025
			Fruit		SRR10064020
					SRR10064019
					SRR10064018
					SRR10064017
